# Supplementary material for: Formation mechanism of radial mesocrystals consisting of ZnO nanowires
Source: Royal Society of Chemistry journal article supplement (doi:10.1039/d3ce00785e), 2023-01-01
Supplement: d3ce00785e1.pdf [file d3ce00785e1.pdf]

## Supporting Information for

# Formation Mechanism of Radial Mesocrystals Consisting of ZnO Nanowires

YaoZong Yan,<sup>a</sup> Hiroaki Tada,<sup>\*b</sup> Hisashi Sugime,<sup>a,c</sup> Tetsuro Soejima<sup>\*a,c</sup>

<sup>a</sup> Graduate School of Science and Engineering, Kindai University, 3-4-1, Kowakae, Higashi-Osaka, Osaka 577-8502, Japan.

<sup>b</sup> Institutes of Innovation for Future Society, Nagoya University, Chikusa-ku, Nagoya 464-8603, Japan. E-mail: hiroaki.tada@mirai.nagoya-u.ac.jp

<sup>c</sup> Department of Applied Chemistry, Faculty of Science and Engineering, Kindai University, 3-4-1, Kowakae, Higashi-Osaka, Osaka 577-8502, Japan. E-mail: soejima@apch.kindai.ac.jp

## Table of Contents

|                                                                                                                                                                                     |   |
|-------------------------------------------------------------------------------------------------------------------------------------------------------------------------------------|---|
| <b>Figure S1.</b> Low magnification SEM image of the sample prepared from the mixed solution of $\text{Zn}(\text{NO}_3)_2$ and HMT at $t_r = 3$ h. ....                             | 2 |
| <b>Figure S2.</b> (a) XRD patterns of as-grown samples with varying reaction time. (b) Change in the full-width at half maximum (FWHM) of the (100) diffraction peaks. ....         | 2 |
| <b>Figure S3.</b> (a) Kubelka-Munk-transformed absorption spectra for the samples prepared at $T_r = 90^\circ\text{C}$ and varying $t_r$ . (b) The Tauc plots for the samples. .... | 3 |
| <b>Figure S4.</b> Yield of ZnO as a function of reaction time. In this case, the yield was calculated by assuming that all the solids are ZnO. ....                                 | 3 |
| <b>Figure S5.</b> TEM images of the samples produced when the reaction temperature reaches $90^\circ\text{C}$ . ...                                                                 | 4 |
| <b>Figure S6.</b> Time change in the pH of the HMT aqueous solution in the absence and presence of $\text{Zn}(\text{NO}_3)_2$ . ....                                                | 4 |
| <b>Figure S7. (a-b)</b> High magnification SEM images of the sample prepared from the mixed solution of $\text{Zn}(\text{NO}_3)_2$ and HMT at $t_r = 3$ h. ....                     | 5 |
| <b>Figure S8.</b> HR-TEM images of a tapered ZnO NW.                                                                                                                                |   |

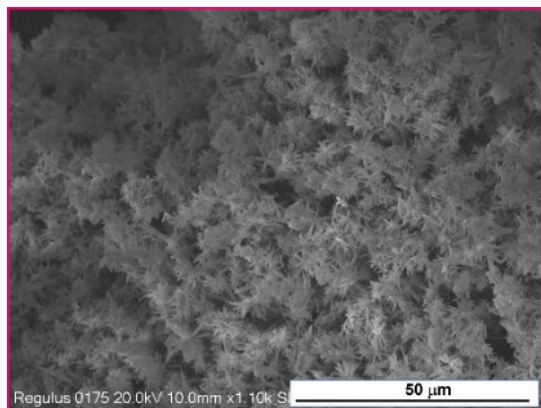

**Figure S1.** Low magnification SEM image of the sample prepared from the mixed solution of  $\text{Zn}(\text{NO}_3)_2$  and HMT at  $t_r = 3$  h.

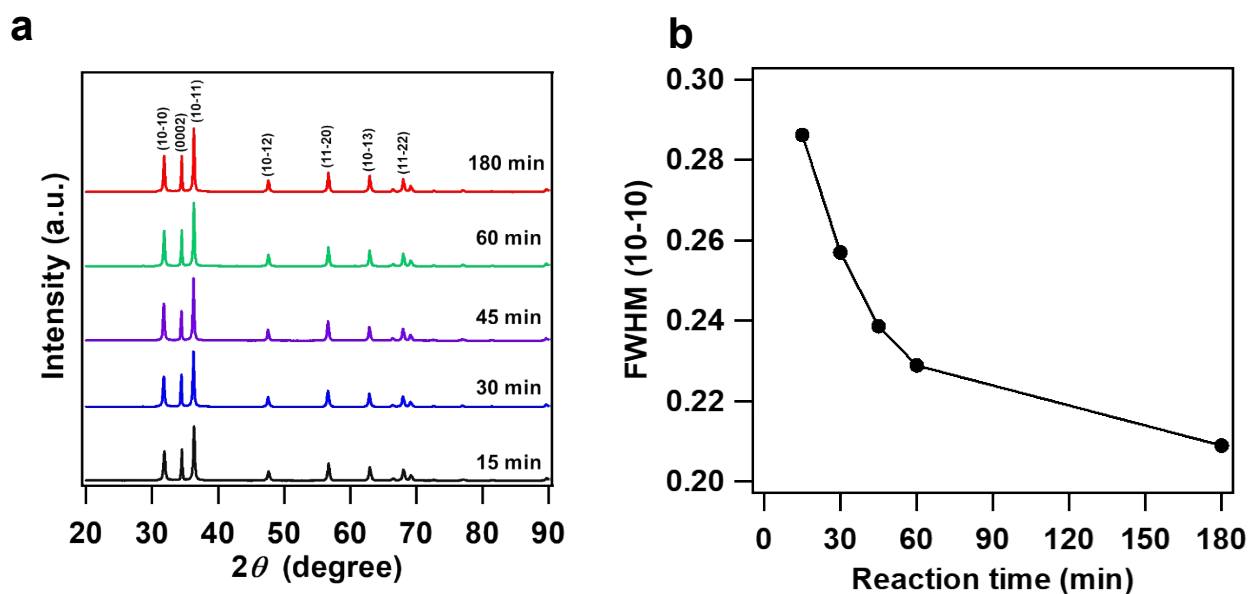

**Figure S2.** (a) XRD patterns of as-grown samples with varying reaction time. (b) Change in the full-width at half maximum (FWHM) of the (100) diffraction peaks.

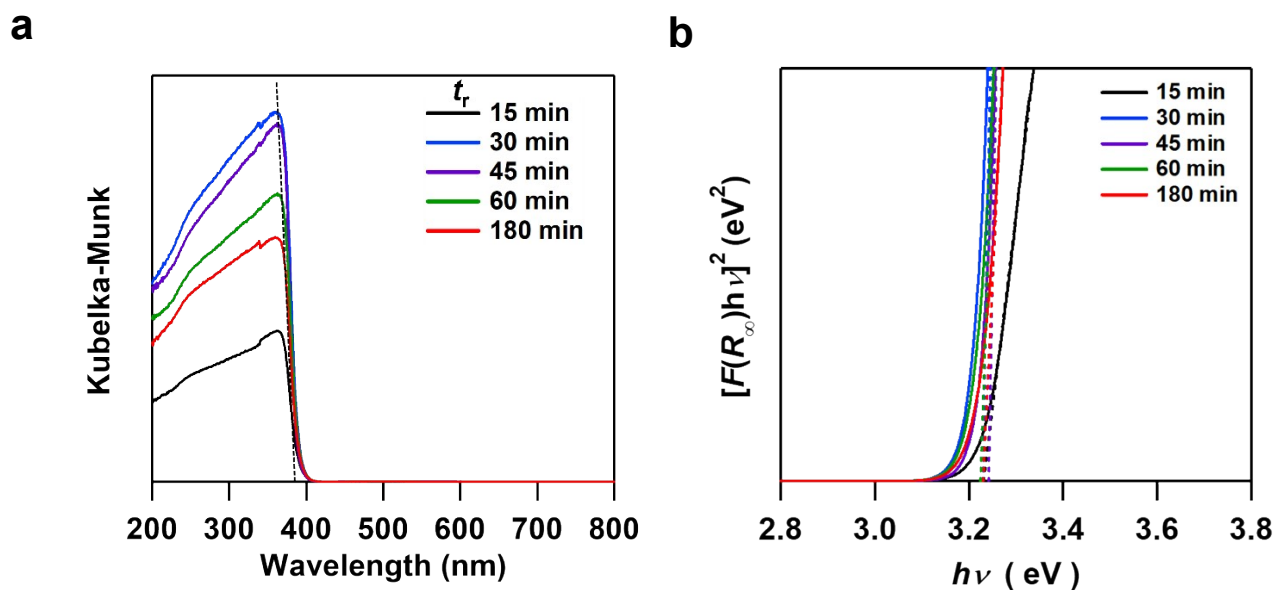

**Figure S3.** (a) Kubelka-Munk-transformed absorption spectra for the samples prepared at  $T_r = 90^\circ\text{C}$  and varying  $t_r$ . (b) The Tauc plots for the samples.

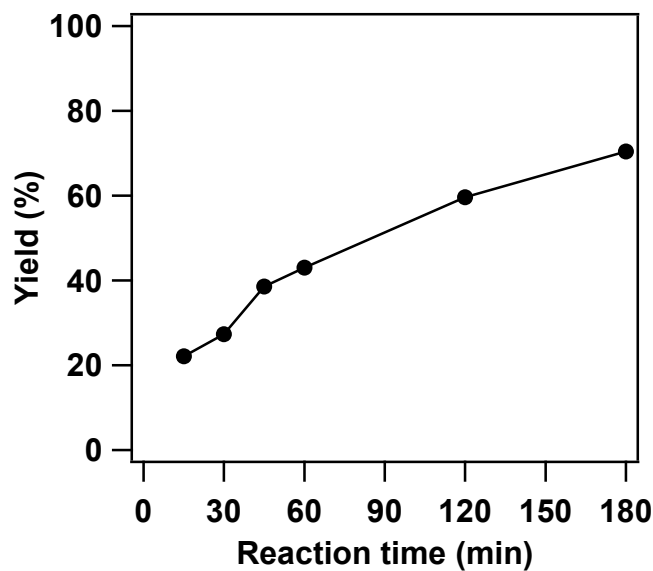

**Figure S4.** Yield of ZnO as a function of reaction time. In this case, the yield was calculated by assuming that all the solids are ZnO.

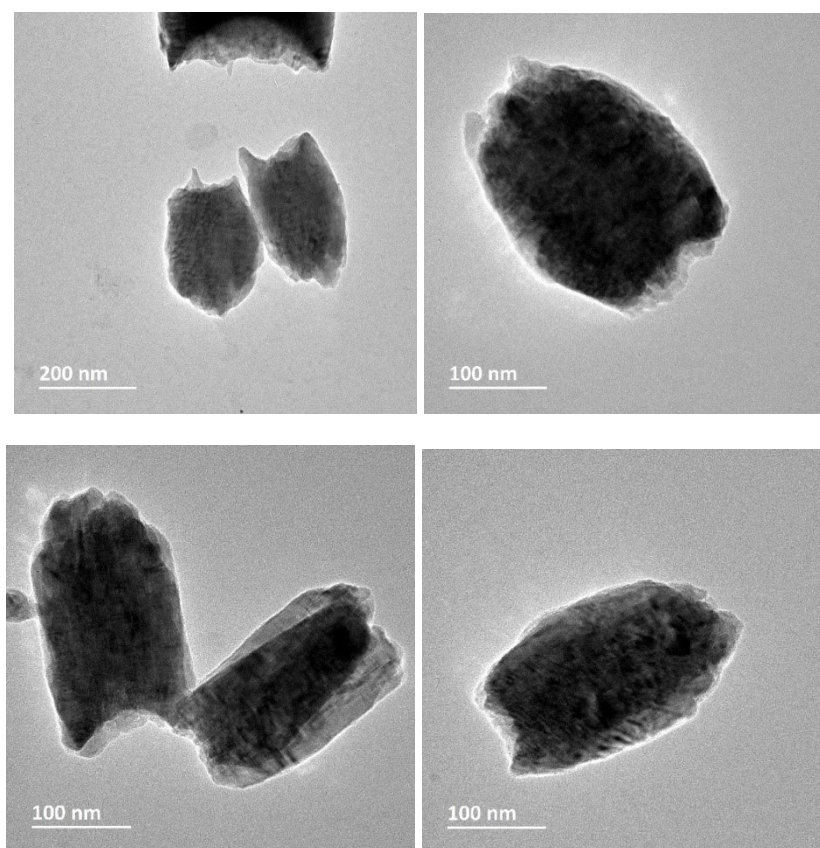

**Figure S5.** TEM images of the samples produced when the reaction temperature reaches 90°C.

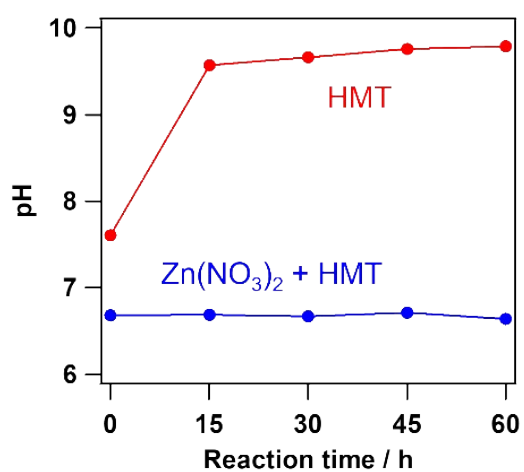

**Figure S6.** Time change in the pH of the HMT aqueous solution in the absence and presence of Zn(NO<sub>3</sub>)<sub>2</sub>.

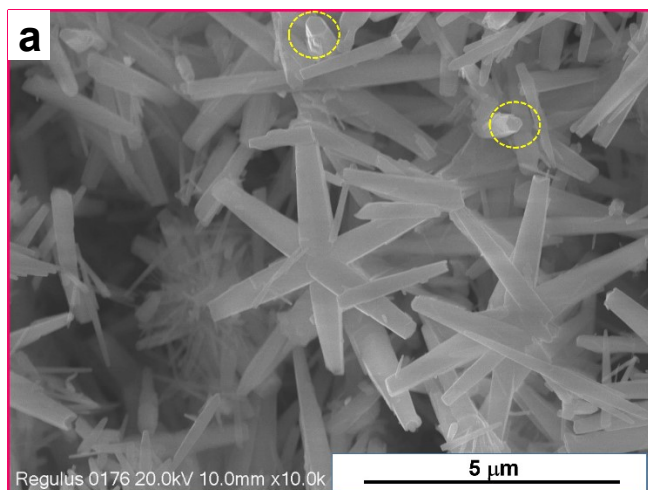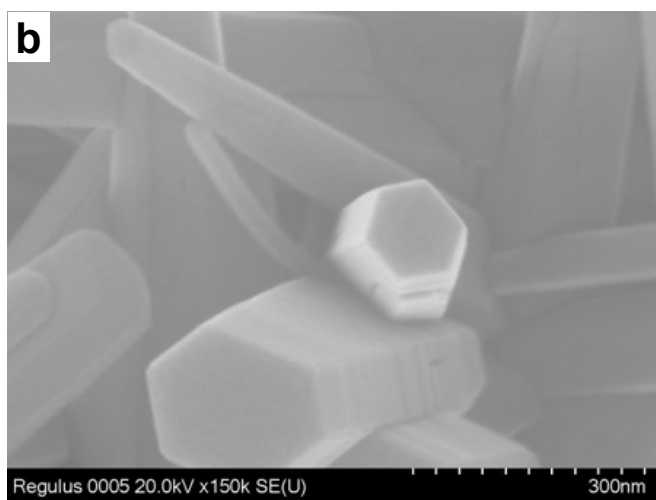

**Figure S7. (a-b)** High magnification SEM images of the sample prepared from the mixed solution of  $\text{Zn}(\text{NO}_3)_2$  and HMT at  $t_r = 3$  h.

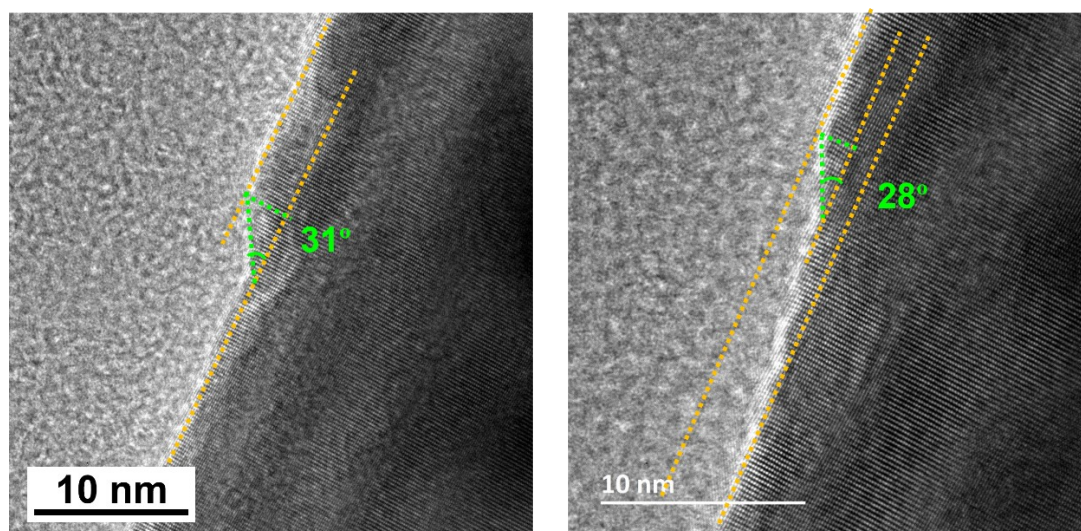

**Figure S8.** HR-TEM images of a tapered ZnO NW.
